# Supplementary material for: Neural Insensitivity to the Effects of Hunger in Women Remitted From Anorexia Nervosa
Source: Atypon-hosted journal article supplement (doi:10.1176/appi.ajp.2019.19030261), 2020-03-12
Supplement: appi.ajp.2019.19030261.ds001.pdf [file appi.ajp.2019.19030261.ds001.pdf]

 


Psychiatry Online
